# Supplementary material for: Grain engineered polar-axis-oriented epitaxial Mn2Mo3O8 films with enhanced magnetic transition temperature
Source: Royal Society of Chemistry journal article supplement (doi:10.1039/d3tc00730h), 2023-01-01
Supplement: d3tc00730h1.pdf [file d3tc00730h1.pdf]

Supporting information for:

## Grain engineered polar-axis-oriented epitaxial $\text{Mn}_2\text{Mo}_3\text{O}_8$ films with higher magnetic transition temperature

Shishin Mo<sup>1</sup>, Tsukasa Katayama<sup>2,3\*</sup>, Akira Chikamatsu<sup>4</sup> and Tetsuya Hasegawa<sup>1</sup>

<sup>1</sup>Department of Chemistry, The University of Tokyo, Bunkyo-ku, Tokyo, 113-0033, Japan

<sup>2</sup>Research Institute for Electronic Science, Hokkaido University, Sapporo, Hokkaido, 001-0020, Japan

<sup>3</sup>JST-PRESTO, Kawaguchi, Saitama 332-0012, Japan

<sup>4</sup>Department of Chemistry, Faculty of Science, Ochanomizu University, 2-1-1 Otsuka, Bunkyo-ku, Tokyo 112-8610, Japan

E-mail: katayama@es.hokudai.ac.jp

**Table S1.** Lattice constants of MMO films on YSZ(111) substrates.

| Thickness (nm) | 15    | 20    | 35    | 52    | 100   | Bulk <sup>1</sup> |
|----------------|-------|-------|-------|-------|-------|-------------------|
| $a$ (Å)        | 5.83  | 5.82  | 5.83  | 5.81  | 5.80  | 5.8003            |
| $c$ (Å)        | 10.25 | 10.22 | 10.21 | 10.17 | 10.19 | 10.2425           |

**Table S2.** Lattice constants,  $T_N$  and  $V_f$  for bulk MMO and MMO films deposited on  $\text{Al}_2\text{O}_3$  and YSZ substrates.

|                                                            | $a$ (Å) | $c$ (Å) | $T_N$ (K) | $V_f$ (%) |
|------------------------------------------------------------|---------|---------|-----------|-----------|
| Bulk MMO                                                   | 5.8003  | 10.2425 | 41        | 0         |
| 140-nm-thick MMO film on $\text{Al}_2\text{O}_3$ substrate | 5.83    | 10.17   | 108       | 0         |
| 35-nm-thick MMO film on YSZ substrate                      | 5.83    | 10.21   | 122       | 2         |
| 100-nm-thick MMO film on YSZ substrate                     | 5.80    | 10.19   | 163       | 44        |

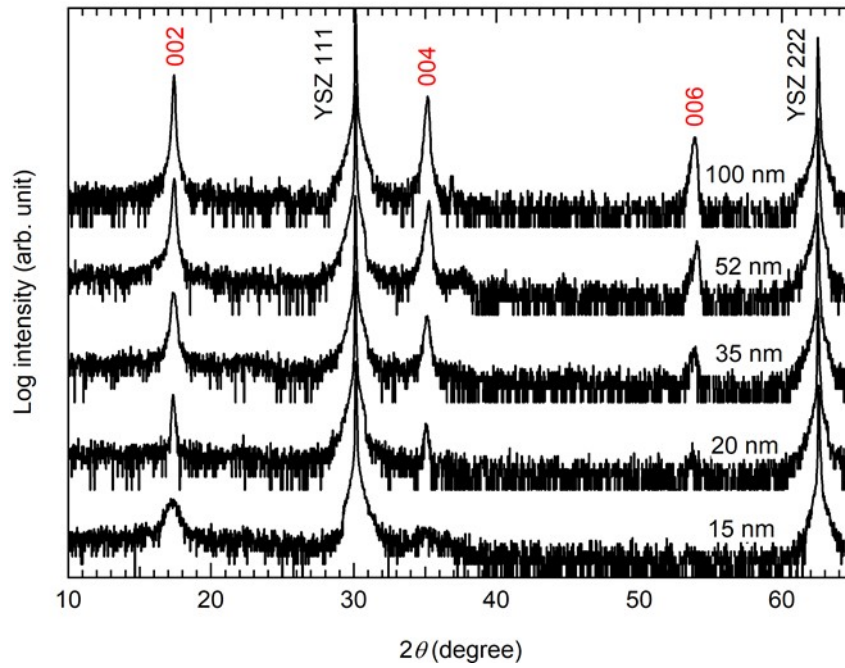

**Figure S1.** Out-of-plane  $2\theta$ - $\theta$  XRD patterns of the MMO films on YSZ(111) substrates.

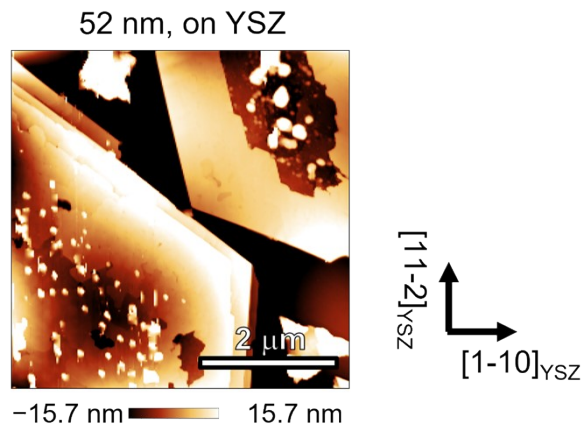

**Figure S2.** AFM image of the 52-nm-thick MMO film on YSZ(111) substrate.

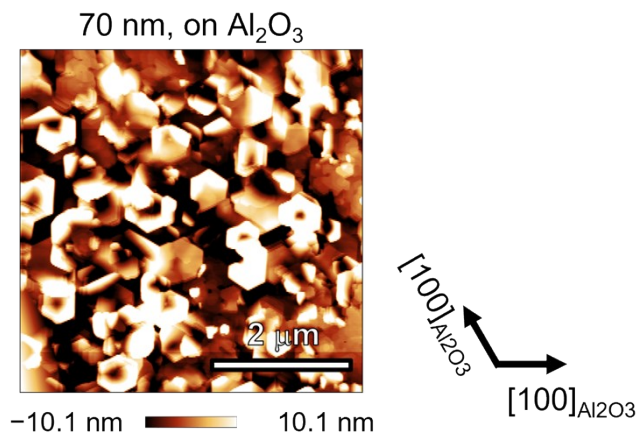

**Figure S3.** AFM image of the MMO film on Al<sub>2</sub>O<sub>3</sub>(001) substrate.

#### Reference

- 1 H. Abe, A. Sato, N. Tsujii, T. Furubayashi and M. Shimoda, *J. Solid State Chem.*, 2010, **183**, 379–384.
